# Supplementary material for: Leukemia Cell of Origin Influences Apoptotic Priming and Sensitivity to LSD1 Inhibition
Source: Oxford University Press journal article supplement (doi:10.1158/2159-8290.cd-19-1469), 2020-06-30
Supplement: 21598290cd191469-sup-233963_2_supp_6378343_qcr1r2.xlsx [file 21598290cd191469-sup-233963_2_supp_6378343_qcr1r2.xlsx]

## Sheet: D6 log2 Fold Change
shRNA ID	mean log2 FC
Homez.5225	2.91864
Fiz1.2202	2.44783
Prmt1.630	2.09734
Sfmbt2.1140	1.94985
Ring1.1540	1.8632
Brd9.1362	1.75815
Foxa1.2787	1.729
Phf17.1814	1.68516
Padi3.309	1.68041
Asap1.4564	1.61827
Smyd2.428	1.587
Kdm1b.3274	1.56743
Zhx3.398	1.52406
Gadd45a.843	1.48836
Dctd.1651	1.48459
Parp14.2094	1.48189
Fkbp2.191	1.44008
Csnk2a1.289	1.41792
Suv39h2.3099	1.4028
Pax6.2212	1.39797
Trp53.1224	1.37351
Ing3.1749	1.34375
Smarcd1.1690	1.33906
Crebbp.2118	1.31528
Uty.2033	1.30099
Wdr61.49	1.2903
Sub1.1540	1.27903
Rfwd2.1442	1.27875
Suv39h2.2981	1.27543
Nr0b2.1023	1.2754
Rps19bp1.374	1.27274
Ppib.231	1.26369
Myst2.1183	1.26097
Tet2.6868	1.25169
Suv420h1.3131	1.22006
Pax6.2510	1.21563
Phf17.1441	1.21026
Renilla.713	1.20075
Kat5.1387	1.19583
Jarid1d.4830	1.19092
Nap1l2.1093	1.17423
Ube2a.920	1.16828
Art1.904	1.15576
Setdb2.2915	1.14847
Jhdm1d.8524	1.14255
Msl3.1994	1.14062
Hltf.1463	1.13055
Smarca5.1139	1.12643
EG546387.1344	1.12554
Rnf2.1856	1.12365
Wbp7.3031	1.12265
Baz2a.8224	1.11552
Jmjd2d.2310	1.1152
Mbd4.3297	1.11338
Suds3.1150	1.11178
Cecr2.5968	1.10991
Cbx4.2573	1.10081
Trim5.2011	1.09531
Rfwd2.2364	1.08106
Rnf2.2203	1.07314
Pag1.8082	1.07154
Trdmt1.1028	1.06504
Baz2b.5937	1.05607
Atxn3.388	1.05522
Brd2.1598	1.05404
Suv39h2.301	1.04908
Siah2.2065	1.04285
Trdmt1.727	1.0413
Parp9.3485	1.04117
Myst2.176	1.04071
Bmi1.1440	1.03503
Morf4l2.1242	1.02139
Brd3.4162	1.01646
Chd5.2900	1.01362
Bmi1.1746	1.01044
Iws1.7980	1.00937
Alkbh3.1184	1.0066
Jarid2.2632	1.00588
Foxa1.2524	1.00293
Ing4.65	0.992876
Psd3.8282	0.992708
Smyd4.3333	0.988546
2410016O06Rik.1836	0.986876
Rc3h1.1392	0.981502
Baz2b.4462	0.979344
Hnrnpa1.1320	0.979213
Atad2.5263	0.976752
Elp3.1998	0.974234
Hdac6.2793	0.972079
Atad2.3568	0.971055
Smarca1.1893	0.970228
Smyd1.680	0.967961
Parp6.2274	0.967713
Prdm8.3042	0.966124
Sap30l.1180	0.95208
Pbx1.1632	0.951193
Rps6ka3.1301	0.949626
Arih2.3832	0.94484
Psd3.2456	0.944517
Rps6ka5.2950	0.935269
Hltf.455	0.933721
Eid1.1045	0.930919
Sirt1.1708	0.93017
Cdyl.2098	0.927284
Sub1.954	0.926536
Ncoa1.5152	0.923469
Parg.892	0.92301
Dnmt3a.4173	0.918999
Jmjd2c.2222	0.908933
Rbbp4.4075	0.905678
Fbxw9.1807	0.901434
Apobec3.1830	0.890636
Ing5.495	0.889683
Mtf2.1958	0.883783
Psd3.6165	0.87794
Uhrf1.3145	0.875795
Siah2.2253	0.875154
Jarid2.469	0.869506
Brd8.3181	0.86896
Suv420h1.3357	0.861507
Ube4a.138	0.860377
Usp13.3491	0.858895
Ncor2.7197	0.858477
Cdc34.1230	0.857489
Zscan21.640	0.855309
Trp53bp1.1847	0.853407
Wnt5a.4154	0.852883
Trim5.1735	0.849696
Gadd45b.683	0.849628
Bmi1.698	0.848296
Nono.2430	0.847035
Mll5.821	0.846835
Setd5.3997	0.846068
L3mbtl3.2583	0.845478
Ube2n.3349	0.840898
Asap1.482	0.83781
Parp12.3194	0.834431
Atm.7782	0.833963
Baz2b.857	0.824489
Ctsl.1947	0.820437
Gadd45b.714	0.816712
Nap1l1.3414	0.809789
Zfp787.1671	0.80952
Naa15.5294	0.80905
Brd7.787	0.803214
Chd2.3700	0.802877
Dzip3.4402	0.802679
Parp11.1408	0.799458
Ube2m.199	0.798277
Brdt.602	0.79506
Bub3.309	0.793878
Pax9.1591	0.790788
Usp13.420	0.788371
Sirt2.1604	0.787889
Actr5.1892	0.786682
Rps19bp1.362	0.785016
Ncoa3.1038	0.779778
Setd5.226	0.778456
Tet2.5810	0.777541
Parp4.3691	0.776197
Uty.714	0.774963
Smyd2.181	0.773225
Naa15.5930	0.77308
Ercc5.2801	0.772584
Atad2b.1888	0.77188
1600027N09Rik.787	0.771072
Tet1.6412	0.770621
Psd3.3975	0.770533
Csnk2a1.2045	0.767868
Epc1.1362	0.767839
Setd5.5229	0.766214
Pax6.2413	0.764736
Trim24.2178	0.761931
Sp140.1101	0.761728
Erg.1967	0.757471
Parp9.1580	0.75617
LOC100040412.408	0.753743
Fbxo17.1927	0.75337
Chd8.6946	0.753004
Ube3a.1527	0.752216
Zhx1.1362	0.750961
Parp14.3785	0.749369
Wdr77.2287	0.748071
Parp8.2589	0.744033
Brdt.353	0.743271
Cbx8.1125	0.74299
Atad2.5509	0.742687
Ube2q2.1425	0.741694
LOC100040412.353	0.739801
Ube2i.2212	0.734634
Tiparp.3344	0.733614
Pax6.2414	0.731918
Apobec4.1206	0.729815
Uba7.1958	0.72938
Sp140.702	0.729144
Dzip3.4388	0.728477
Kdm1b.3970	0.727387
Elp4.1107	0.721243
Setd3.2636	0.720697
Rps6ka3.807	0.719416
Dnmt3b.2259	0.718442
L3mbtl.725	0.711244
Rnf217.2701	0.706531
Jmjd2b.1151	0.705195
Phip.6197	0.702914
Brwd1.447	0.702724
Mll1.16168	0.702387
Bptf.3023	0.701597
E130308A19Rik.800	0.700793
Hnrnpa2b1.567	0.69909
Uba1.2252	0.697036
Mll1.16304	0.696841
Mterf.1170	0.696609
Parp6.2271	0.683529
Baz2a.3748	0.683187
Atxn3.553	0.68284
Nap1l1.3410	0.681193
Zhx1.3730	0.681158
Trim5.2074	0.678935
Gadd45a.1187	0.674971
Sirt5.84	0.672957
Brd3.445	0.671543
Asap1.2947	0.669819
Trdmt1.976	0.669246
Pax5.1077	0.667505
Ube2n.3348	0.66643
Edf1.201	0.666413
Taf9b.2368	0.665753
Daxx.499	0.665646
Fbxw9.1803	0.664718
Epc1.1392	0.660464
Bcor.5792	0.660069
Brpf1.2813	0.659059
Lcor.2600	0.658617
Parp6.364	0.65828
Tlk1.527	0.654558
Suds3.2314	0.653828
Jmjd6.1633	0.653596
Trim33.1776	0.653304
Cdca7l.1475	0.652386
Zhx1.3212	0.651302
Psd3.4624	0.650256
Brd8.2410	0.649665
Nedd4l.2650	0.648268
Jhdm1d.3273	0.647364
Gsg2.2164	0.645265
1600027N09Rik.150	0.644409
Emg1.343	0.64347
Sub1.1947	0.640372
Cbx8.1292	0.637658
Runx1.5094	0.636193
Apobec3.1836	0.633456
Brdt.1133	0.633255
E130012A19Rik.2297	0.633069
EG546387.1621	0.632864
Fubp3.2737	0.632655
Homez.4718	0.63164
Hprt.529	0.628855
Jmjd8.1414	0.628392
Parp3.740	0.627101
Brd8.2092	0.625906
Ube2b.1626	0.625451
Wbp7.8338	0.625323
Prdm12.2351	0.623297
Pbrm1.4152	0.622445
Fkbp2.583	0.621888
Msl3.554	0.62183
Rc3h1.7901	0.62075
Adprh.1353	0.619184
Hoxc10.723	0.618767
Usp13.3247	0.617146
Chaf1a.409	0.617131
Brdt.664	0.613064
Iws1.6779	0.612525
Apobec2.1012	0.612125
Phip.3809	0.610418
Aicda.1548	0.609593
Ash1l.1031	0.608129
Ino80.2062	0.607601
Adar.113	0.60727
Chd3.7148	0.606382
Zfp740.728	0.605688
Parp8.762	0.604668
Adprhl2.406	0.601211
Pag1.5799	0.600327
Padi2.3596	0.599823
Trim24.3642	0.597801
Jmjd1a.1378	0.597651
Trim37.4728	0.597267
Rfwd2.4896	0.59591
Gtf3c5.2352	0.595817
Bop1.2233	0.595431
Ada.1356	0.591155
EG546387.2159	0.590161
Prdm12.537	0.589375
Rps6ka5.2208	0.587663
Hdac8.623	0.586417
Cda.792	0.583482
Pcmt1.1369	0.57962
Chd1l.1815	0.575383
Parp4.1723	0.574756
Cdca7l.1774	0.574411
Zbtb40.1265	0.57433
Zscan21.2101	0.574047
Usf2.2372	0.573732
Setdb1.1405	0.572718
Mterf.1171	0.572654
Hat1.638	0.56733
Smyd1.1133	0.565995
Usp34.418	0.564152
Zbtb33.3372	0.56415
Uty.1386	0.562608
Morf4l2.1527	0.561091
Phf20.5058	0.559741
Cecr2.4830	0.55767
Naa10.332	0.556612
Gadd45a.570	0.553508
Hnrnpa1.323	0.547693
Phf20l1.6388	0.54713
Atxn3.869	0.545454
Hira.3291	0.543675
Baz1b.5584	0.543617
Vrk2.346	0.543302
Tiparp.2700	0.540666
Mbd1.351	0.54043
Ep400.2696	0.538505
Ing5.728	0.537575
Kat2b.3494	0.5373
Runx1.4616	0.536487
Ube2c.888	0.534284
Suz12.4300	0.529588
Rps6ka5.2007	0.529489
Pogz.6619	0.529288
Jmjd8.1980	0.528183
Brd7.808	0.527701
Prmt5.814	0.526628
Ftsj3.2530	0.525813
4931414P19Rik.1293	0.524667
Naa10.833	0.523329
Arih2.150	0.522658
Msl3.1986	0.517652
Smyd1.1635	0.517126
2410016O06Rik.2242	0.516465
Tet3.10730	0.516078
Prdm11.3217	0.515766
Parp4.3882	0.514238
Dnmt3b.3608	0.51304
Sp140.1902	0.512626
Mds1.453	0.510468
Ube2i.2237	0.50605
Brdt.1077	0.505906
Apobec4.1423	0.50511
Adprhl2.547	0.503293
Asap1.4133	0.503058
Cbx8.1068	0.499668
Fubp3.3449	0.499534
Sin3a.2127	0.498343
Pbx1.990	0.495873
Ing4.380	0.49417
Ncoa1.5920	0.4938
Parp14.2271	0.492445
Atrx.7377	0.491717
Noc2l.2146	0.487751
Hnrnpa2b1.562	0.48598
Naa10.823	0.481162
Pbrm1.3412	0.47938
Padi6.679	0.478977
Cux1.180	0.478176
Aurka.703	0.476716
L3mbtl3.2690	0.476358
Rfxap.748	0.475916
Sirt2.1123	0.475804
Sfmbt2.7184	0.474102
Myst4.1409	0.473857
Nr0b2.1068	0.473259
Rnf40.2328	0.471962
Noc2l.1762	0.470797
EG546387.496	0.467641
Zmynd11.2395	0.466647
Sp100.934	0.46534
Jarid1c.1882	0.464837
Csnk2a1.3880	0.464438
Zbtb12.1722	0.462413
Setdb2.1417	0.459594
Pbrm1.6936	0.458766
Msl3.2230	0.458608
Jmjd3.4995	0.457943
Adar.2578	0.455979
Zmynd11.437	0.45554
Setd7.5317	0.455246
Jmjd1a.2782	0.454087
Wdr61.45	0.4528
Fkbp1a.827	0.449154
Parp12.1066	0.448223
Ncor1.8275	0.447671
Sp110.207	0.446509
Jarid1d.2178	0.444303
Chd1.746	0.444151
Actr5.1241	0.443402
Rfx5.2594	0.440531
Parp11.2349	0.440257
Scand3.1042	0.440066
Lnx1.722	0.438565
Parp14.4144	0.438144
Hat1.866	0.436562
Actr5.1025	0.435868
Smyd5.1643	0.4357
Kat5.200	0.433891
E130308A19Rik.459	0.433798
Wdr61.673	0.432644
Rnf217.1408	0.431669
Gtf3c4.3163	0.431612
Rbbp4.1557	0.43023
Brd1.287	0.429299
Cdca7l.1521	0.428264
Hnrnpa1.1649	0.428191
Prmt6.247	0.425893
E130308A19Rik.420	0.425537
Trp53bp1.1056	0.423697
Chd1l.1538	0.422812
Rps6ka5.3948	0.419329
Nap1l1.2360	0.4191
Wdr61.328	0.418937
Zfp740.3426	0.418398
Apobec4.50	0.418289
Ncor2.6405	0.417691
Trdmt1.840	0.417291
Tlk1.1668	0.415949
Gsg2.2421	0.41525
Tlk1.2669	0.414546
Cdyl2.2044	0.410235
Trim37.1309	0.409258
Ube4a.5623	0.406251
Hdac8.1692	0.405534
Ube2q2.1033	0.404858
Hira.1539	0.40317
Suds3.2101	0.401319
Rbbp7.957	0.398101
Prdm8.2945	0.398039
Zfp295.5061	0.394786
Bub3.407	0.394604
Chd3.7149	0.391776
Rnf217.2525	0.390131
Zfp787.1536	0.389729
Nono.1128	0.389095
Gatad2a.4673	0.387807
Sirt1.2924	0.386375
Hat1.290	0.380858
Mecp2.7745	0.376695
Mterf.948	0.375903
Mtr.2165	0.373605
Nedd4l.6057	0.373007
Kat5.1319	0.370237
Zfp787.1738	0.369622
Camk4.8907	0.368966
Parp16.1935	0.368158
Usp35.3214	0.367404
Usp34.1704	0.366969
Ada.834	0.360686
Daxx.125	0.360433
Parp11.349	0.355823
Ube2e3.992	0.353142
Jmjd3.6295	0.352664
Elp4.2823	0.35028
L3mbtl3.2004	0.349328
Lcor.3936	0.346635
Aurka.1602	0.34281
Ada.1342	0.342743
Prdm5.1429	0.342099
Phf20.4725	0.339952
Smyd4.3439	0.339745
Taf9b.735	0.337398
Trdmt1.2324	0.336322
Tiparp.1634	0.334169
Nr2c1.2044	0.332564
Usp35.3443	0.33172
Homez.3905	0.331697
Eid1.1199	0.330934
Rfxap.971	0.327914
Parg.2504	0.327823
Phf2.4008	0.327052
Mll5.1622	0.32607
Pbx1.989	0.325439
Parp10.2901	0.32527
Foxa1.2961	0.323747
Ube3a.2638	0.323612
Atxn3.551	0.321115
Prmt8.1099	0.318132
Rfx5.1512	0.317764
Aurka.701	0.317568
Fbxl11.1904	0.310013
Ube2m.73	0.309141
Elp4.3082	0.307494
Ppib.591	0.307028
Vrk2.345	0.306925
Brwd3.5109	0.306519
Ywhaq.1398	0.304934
Gsg2.2165	0.304537
Prdm13.2936	0.3031
Ssrp1.2237	0.302277
Atad2.900	0.301994
Ube2c.546	0.301521
Usf2.579	0.301343
Sik1.2602	0.301015
Gsg2.2146	0.300749
Paxip1.3670	0.297643
Ube2q2.2482	0.296166
Nr2c1.1928	0.294695
Baz2b.5094	0.293891
Tox4.3756	0.29266
Mtf2.2791	0.291207
Mbd3.1452	0.290783
Rfx5.2324	0.287951
Parp6.2366	0.286683
Mtr.2540	0.282388
Tet1.1856	0.282089
Apobec2.1182	0.281646
Ube2e3.982	0.27965
Zhx3.3588	0.278238
Taf9b.1848	0.278112
Cecr2.5286	0.276914
Setd3.1736	0.276909
Ing5.2290	0.269
Usp35.2123	0.268701
Hdac4.1612	0.267006
Tlk1.3494	0.266557
Cbx5.4409	0.265403
Hprt.1165	0.265372
Whsc1.583	0.265012
Ftsj3.2527	0.263521
Chd5.6392	0.26202
Adprh.846	0.260443
Rps6ka4.2662	0.259869
Chd5.587	0.258356
Hltf.2092	0.25784
Cdyl.646	0.25724
Mds1.577	0.256927
Fiz1.1564	0.255384
Tet3.2461	0.253458
Fbxo44.1132	0.252605
Setd4.373	0.252446
Mbd4.3294	0.250627
Cdk9.1689	0.248549
Jmjd6.587	0.246477
Nr2c1.2707	0.246055
Jmjd2b.4162	0.245418
Jarid1d.2946	0.241223
Dido1.865	0.241065
Tet1.3380	0.238937
Sirt7.844	0.235366
Fubp3.2433	0.235206
Mtf2.2825	0.233604
Ing4.279	0.232041
Sp110.456	0.231804
Trim37.636	0.231121
Sirt4.712	0.226739
Zbtb12.1408	0.225333
Hdac7.836	0.22375
Aicda.2218	0.2236
Cdk2ap1.1065	0.222712
LOC664892.1500	0.221745
Actl6a.509	0.220746
Phip.9898	0.218988
Bptf.4355	0.216457
Mtr.230	0.214521
Jmjd2d.2358	0.21374
Gtf3c5.1082	0.213722
Fus.935	0.213305
Elp3.2457	0.212789
Rc3h1.8841	0.21047
Padi3.2772	0.208717
Cdyl.839	0.206231
Mta3.122	0.205301
Parg.4340	0.204841
Zmynd8.2067	0.204443
Gadd45a.1045	0.200647
Parp9.777	0.199997
Mbd4.2166	0.199193
Prkaa1.3635	0.199084
Pknox1.189	0.198979
EG330129.1056	0.198118
Parg.856	0.192255
Padi1.520	0.190519
Ube4a.4677	0.190197
Rc3h1.4576	0.189942
Sik1.387	0.187577
Sirt1.1705	0.186609
Junb.287	0.186449
Flywch1.1384	0.185769
Hnrnpa0.2220	0.185223
Trim66.5864	0.183068
2410016O06Rik.1370	0.182266
Jak2.4554	0.182219
Flywch1.2258	0.180401
Lnx1.387	0.179373
Parp14.4257	0.178605
Zbtb33.4237	0.176676
Adprh.1458	0.17614
Ube3a.1516	0.175029
4931414P19Rik.1828	0.174702
Chd9.9971	0.174618
Setd3.2395	0.173267
Uba7.3124	0.17303
Ikbkap.2297	0.172166
Jarid1c.6222	0.170391
Sap30.880	0.167418
Tox4.59	0.166466
Rc3h1.4783	0.16457
Gadd45b.966	0.162871
Edf1.486	0.162302
Trim5.533	0.162112
Setd1a.5541	0.161094
Elp4.2264	0.155233
Aicda.2219	0.152527
Pax6.2321	0.151373
Sfmbt2.3333	0.151177
Ube2i.2498	0.150964
Parg.3804	0.148631
Morf4l2.554	0.148395
Asxl3.6101	0.14554
Nat6.147	0.145331
Cdk2ap1.816	0.145304
Sp110.1320	0.143052
Phip.10157	0.142829
Phf17.4136	0.142003
Apobec3.1303	0.141556
Phf20.1383	0.141092
Usp34.3216	0.139526
Nono.141	0.126586
Brca1.5246	0.125514
Cdyl2.2270	0.125431
Chaf1b.901	0.124234
Ino80.938	0.122956
Ppargc1a.669	0.120833
L3mbtl3.586	0.118586
Cdyl2.1086	0.116272
Nono.487	0.115082
Wdr61.679	0.111844
Dido1.1497	0.107923
Prdm16.680	0.105323
Dnmt3a.4575	0.101587
Prmt3.838	0.0988818
Baz2b.5935	0.0987957
Rps6ka4.1688	0.096304
Atad2b.6846	0.0949729
Epc1.1153	0.0943399
Chd6.9610	0.0941302
Adprhl2.544	0.0911313
Ncor1.1427	0.0837944
Adar.4908	0.0836372
Sp140.642	0.0834092
Rfwd2.3561	0.0831891
Trim37.3518	0.0824338
Utx.4510	0.0822255
Cdk9.2891	0.0817313
Cux1.515	0.0814582
Usp34.12098	0.078968
Trim5.282	0.0776853
Arid1a.8140	0.0769936
Apobec4.281	0.0754071
Hnrnpa0.1977	0.0727908
Apobec2.1121	0.0723962
Gtf3c5.1436	0.0703888
Parp11.3104	0.0661649
Rps6ka3.609	0.065879
Kdm1b.3971	0.0654363
Ube2n.3769	0.0630403
Zhx1.4347	0.0617473
Brd1.3942	0.0610116
Fbxo44.338	0.058726
Apobec3.182	0.0586511
Ctsl.940	0.0581508
Rfxap.1866	0.0577516
Pag1.7226	0.0570511
Brpf1.2430	0.0545718
Parg.3042	0.0486903
Mecp2.5438	0.0477048
Mta3.225	0.0475783
Bub3.356	0.0449801
Jarid2.2191	0.0430932
Padi1.371	0.0391439
Ing5.2222	0.0382817
Tet1.6406	0.03812
Emg1.82	0.0361977
Cux1.578	0.0349612
Dot1l.674	0.022008
Rps6ka4.2505	0.0194245
Ppib.224	0.019047
L3mbtl.373	0.0149686
Dot1l.5654	0.0125488
Usp35.1553	0.0125209
Zbtb33.4232	0.0118392
Sap30.806	0.00934026
Fbxw9.781	0.00795112
Fbxl11.1411	0.00544683
Brd7.775	0.00504857
Camk4.2220	0.00379618
Chd9.3646	0.00281862
Lrwd1.1852	0.0025467
Pbx1.1626	0.0014607
Csnk2a1.1014	0.00123574
Lnx1.272	0.0011024
Parp10.2929	-0.000179637
Rfxank.2468	-0.00386129
Phip.9836	-0.00604868
Zfp295.5038	-0.00715465
Prdm6.2490	-0.00873224
Mll5.2152	-0.00977299
Zmynd8.2361	-0.00989437
Sap30.818	-0.0126331
Erg.1784	-0.0138845
Zbtb9.1993	-0.016018
Setd3.1118	-0.0197563
Zhx1.2661	-0.0201229
Ppib.469	-0.024589
Jmjd8.1265	-0.0251021
Hdac9.2070	-0.0257771
1600027N09Rik.91	-0.026323
Ercc5.1711	-0.0265316
Ercc5.1584	-0.0285828
Uty.1595	-0.0294863
Brd8.3865	-0.0320182
Uba1.1048	-0.0336755
Apobec3.2035	-0.0341858
Chd2.8913	-0.0346216
Fkbp1a.1348	-0.035247
Sub1.224	-0.0380904
Aicda.1307	-0.0382746
Rfxank.1748	-0.0383162
E130012A19Rik.2072	-0.0387779
Mtr.3089	-0.0388915
Eid1.836	-0.0432091
Brdt.1001	-0.0436504
Sp100.544	-0.0440968
Jak2.698	-0.044961
Elp2.2623	-0.0456375
Cdc34.1112	-0.048293
Sap30l.1455	-0.0537014
EG330129.844	-0.0539228
Brwd3.5477	-0.0550099
Ube2a.536	-0.0551654
L3mbtl3.2781	-0.0581168
Dot1l.845	-0.0610601
Zbtb33.1423	-0.0646609
Uba7.799	-0.0651957
Parp3.2082	-0.0690136
Parp3.2069	-0.0705468
Zbtb40.5614	-0.0746417
Gatad2b.228	-0.0748509
Parp3.597	-0.0769715
Jmjd1b.1014	-0.0788481
Myst2.2851	-0.0792899
Alkbh3.273	-0.0796139
1600027N09Rik.903	-0.0819361
Uba7.116	-0.0820905
Zbtb40.771	-0.0821243
Ing4.23	-0.0827971
Smarca5.4522	-0.0838326
Hdac3.161	-0.0859537
Junb.1718	-0.0871735
Zscan21.2098	-0.0889414
Sirt1.688	-0.0898188
Trim24.3357	-0.0909455
Sub1.955	-0.0918421
Pag1.7771	-0.0947657
Ino80.4432	-0.0958224
Zhx2.2205	-0.107974
Cdyl.1060	-0.111116
Flywch1.2264	-0.112654
Setd5.737	-0.116405
Ing3.3592	-0.117047
Jmjd4.2677	-0.120349
Apobec2.1142	-0.120761
Naa10.457	-0.126721
Atxn3.442	-0.129347
Brca1.2701	-0.131348
Jhdm1d.2209	-0.131598
Nedd4l.4964	-0.132001
Runx1.1850	-0.133502
Zhx3.2980	-0.135064
Aicda.1463	-0.137699
Morf4l2.548	-0.151187
Erg.1854	-0.155002
Trim28.2869	-0.156342
Zhx2.3934	-0.156418
Trim24.1211	-0.156436
Dzip3.454	-0.156601
Setd2.3632	-0.157099
Setmar.104	-0.160904
Asxl3.8947	-0.161418
E130012A19Rik.1901	-0.165545
Taf9b.453	-0.166123
Cbx1.1103	-0.167877
Mll3.2993	-0.168688
Rps6ka3.238	-0.168916
Morf4l2.1021	-0.168946
Phf20l1.2679	-0.170334
Baz1a.2095	-0.171842
Usp34.360	-0.172529
LOC100048887.331	-0.174224
Nat6.232	-0.176523
Nat6.341	-0.177548
Tlk1.2663	-0.177606
Naa15.4636	-0.186215
Taf1.2927	-0.194218
Trim66.3607	-0.195019
Dnmt3l.1049	-0.195599
Scand3.2429	-0.207585
Parp12.2864	-0.210585
Daxx.2490	-0.214938
Rps19bp1.784	-0.217913
Suv39h2.4184	-0.223833
Ncor2.6403	-0.225199
Parp10.648	-0.225322
Prkcd.134	-0.227591
Eid1.508	-0.229266
Atxn3.857	-0.230425
Parp16.45	-0.230437
Hells.1703	-0.23291
4931414P19Rik.2465	-0.237621
Taf9b.2365	-0.238486
Setd1a.4674	-0.240452
Ube2i.483	-0.240562
Fbxo17.1752	-0.24194
Suz12.3979	-0.245045
Fiz1.1855	-0.24735
Trim33.1648	-0.249113
Brca1.1326	-0.249478
Zfp740.21	-0.250714
Zfp295.362	-0.250983
Hnrnpa2b1.740	-0.252141
Actl6a.1933	-0.255016
Parp4.3676	-0.256204
Hdac6.3838	-0.257858
Brwd3.2621	-0.260923
Ube2m.346	-0.265154
Zbtb9.1744	-0.270474
LOC100040412.1128	-0.274719
Erg.365	-0.279911
Sap30.772	-0.28105
Wdr82.1889	-0.281372
Nedd4l.1779	-0.287504
Art1.1182	-0.29406
Apobec4.1200	-0.301056
Fbxl10.1099	-0.305643
Ncor1.6461	-0.308295
Baz1a.4993	-0.315234
Ercc5.3697	-0.316446
Ncor2.6404	-0.318254
Smyd4.3414	-0.33138
Trim13.1304	-0.333753
Rbbp5.659	-0.347694
Ada.921	-0.360021
Usp13.3232	-0.362851
Aurka.514	-0.366033
Mtf2.3709	-0.368643
Pax9.1663	-0.36912
Trim28.1180	-0.374305
Suv420h2.1669	-0.377551
Trim33.3977	-0.379525
Ep400.5051	-0.380034
Tet3.9486	-0.386897
Adar.1297	-0.391398
Homez.5228	-0.395886
Fkbp1a.646	-0.398244
Nr0b2.18	-0.399522
Smyd2.1476	-0.400786
Aurka.1601	-0.40574
Cbx4.4403	-0.406085
Zbtb33.1062	-0.40663
Cdk9.3347	-0.410513
Ing3.3464	-0.418478
Whsc1l1.276	-0.41851
Homez.1086	-0.420723
Ube4a.5873	-0.428667
Ehmt2.3146	-0.443717
Gps2.1112	-0.445758
Sp100.132	-0.446411
Atm.9396	-0.453295
Lcor.1756	-0.459998
Hprt.697	-0.470085
Smyd1.1302	-0.47449
Hdac3.854	-0.477249
Atad2b.5670	-0.481257
Jmjd1c.4221	-0.481734
Jarid1c.5632	-0.482523
Ube2e3.1194	-0.482822
Prdm9.1590	-0.489722
Ube2q2.622	-0.489821
Cux1.446	-0.493671
Jarid1c.2010	-0.496707
Tox4.1777	-0.516487
Ube2e1.1041	-0.521442
Pogz.2349	-0.533097
Mta2.1377	-0.533362
Pax6.2372	-0.549108
Pax5.214	-0.555353
Ube3a.1141	-0.555974
Usf2.854	-0.561531
Clock.4611	-0.586113
Cux1.553	-0.58663
Dot1l.3626	-0.592832
Whsc1l1.524	-0.611101
Ikbkap.813	-0.635228
Csnk2b.966	-0.636729
Ikbkap.5523	-0.660556
Mbd4.434	-0.671726
Prdm8.3048	-0.677111
Gtf3c5.1097	-0.690879
Sik1.2654	-0.691238
Prmt1.33	-0.697952
Trim33.1272	-0.711838
Wdr77.2916	-0.751061
Pbx1.1487	-0.777596
Smarcd1.1311	-0.806792
Rps6ka5.3989	-0.809114
Jarid1c.1886	-0.813394
Asap1.481	-0.821005
Setd2.1467	-0.884183
Parp12.1062	-0.888601
Trim13.637	-0.907877
Smarca5.4421	-0.910605
Cdk9.1260	-0.913835
Wdr77.2730	-0.922225
Phf2.5166	-0.924672
Hprt.447	-0.974696
Setd2.182	-1.01246
Nap1l2.819	-1.06401
Ywhaq.1420	-1.07066
Cdyl2.844	-1.19148
Uhrf1.2053	-1.39418
Gatad2a.2395	-1.42962
Smyd1.1698	-1.52686
Hells.1094	-1.74085
Parp10.1097	-2.83257
Pcmt1.171	-3.38299
Baz1a.542	-3.81183
Trp53bp1.317	-5.13787
Fbxo44.1329	-6.94962
